# Supplementary material for: Identification of Key Pathways and Genes in the Dynamic Progression of HCC Based on WGCNA
Source: Genes (Basel). 2018 Feb 14;9(2):92. doi: 10.3390/genes9020092 (PMC5852588; doi:10.3390/genes9020092)
Supplement: Supplementary file 1 [file genes-09-00092-s001.xlsx]

## Sheet: hub genes in five modules
turquoise			brown			yellow			darkred			orange
ProbeID	Gene.Symbol	kMEturquoise	ProbeID	Gene.Symbol	kMEbrown	ProbeID	Gene.Symbol	kMEyellow	ProbeID	Gene.Symbol	kMEdarkred	ProbeID	Gene.Symbol	kMEorange
206102_at	GINS1	0.961363	201946_s_at	CCT2	0.912478	214621_at	GYS2	0.905496	205043_at	CFTR	0.945752	211696_x_at	HBB	0.96565
203755_at	BUB1B	0.941953	210186_s_at	FKBP1A	0.907733	217014_s_at	AZGP1	0.904391	219564_at	KCNJ16	0.933606	209458_x_at	HBA1 /// HBA2	0.956804
204641_at	NEK2	0.941689	214336_s_at	COPA	0.903383	206453_s_at	NDRG2	0.903666	205328_at	CLDN10	0.894807	211745_x_at	HBA1	0.953999
203213_at	CDC2	0.939606	1557910_at	HSP90AB1	0.894739	204704_s_at	ALDOB	0.891695	204454_at	LDOC1	0.886193	214414_x_at	HBA2	0.940286
213007_at	KIAA1794	0.938716	208721_s_at	ANAPC5	0.889445	216958_s_at	IVD	0.888417	204304_s_at	PROM1	0.872739	206834_at	HBD	0.804493
202870_s_at	CDC20	0.936906	201504_s_at	TSN	0.88537	207185_at	SLC10A1	0.887308	205624_at	CPA3	0.855522	204848_x_at	HBG1 /// HBG2	0.78171
201292_at	TOP2A	0.936364	200828_s_at	ZNF207	0.88392	205773_at	CPEB3	0.88528	210715_s_at	SPINT2	0.855221	200056_s_at	C1D	0.778282
202095_s_at	BIRC5	0.936132	203676_at	GNS	0.882587	206541_at	KLKB1	0.883031	204363_at	F3	0.849259	209248_at	GHITM	0.746672
204444_at	KIF11	0.936064	200722_s_at	GPIAP1	0.879022	211231_x_at	CYP4A11	0.877926	220446_s_at	CHST4	0.842455	202026_at	SDHD	0.739347
202954_at	UBE2C	0.932693	217294_s_at	ENO1	0.878807	210301_at	XDH	0.87636	209369_at	ANXA3	0.83751	208671_at	SERINC1	0.737355
218355_at	KIF4A	0.932359	1558214_s_at	CTNNA1	0.875975	213874_at	SERPINA4	0.875184	202286_s_at	TACSTD2	0.83283	214279_s_at	NDRG2	0.732467
212247_at	NUP205	0.92894	212009_s_at	STIP1	0.874838	202960_s_at	MUT	0.873737	207468_s_at	SFRP5	0.831158	220496_at	CLEC1B	0.722653
202705_at	CCNB2	0.927979	201523_x_at	UBE2N	0.870624	218504_at	FAHD2A	0.86967	204201_s_at	PTPN13	0.8283	219076_s_at	PXMP2	0.719459
218662_s_at	NCAPG	0.927313	200008_s_at	GDI2	0.867357	206610_s_at	F11	0.869342	205430_at	BMP5	0.823472	210667_s_at	C21ORF33	0.712528
220060_s_at	C12ORF48	0.92521	211672_s_at	ARPC4	0.866417	207718_x_at	CYP2A6 /// CYP2A7 /// CYP2A7P1 /// CYP2A13	0.868709	204338_s_at	RGS4	0.823058	1555175_a_at	MAWBP	0.711483
218009_s_at	PRC1	0.924162	207791_s_at	RAB1A	0.865826	206514_s_at	CYP4F3 /// CYP4F2	0.866817	205532_s_at	CDH6	0.812731	201044_x_at	DUSP1	0.710865
214710_s_at	CCNB1	0.924067	1554577_a_at	PSMD10	0.864245	218931_at	RAB17	0.863523	204019_s_at	SH3YL1	0.80934	1559065_a_at	CLEC4G	0.709302
218755_at	KIF20A	0.920748	200744_s_at	GNB1	0.863551	219313_at	GRAMD1C	0.863214	206071_s_at	EPHA3	0.808446	208654_s_at	CD164	0.708776
203362_s_at	MAD2L1	0.92037	1555814_a_at	RHOA	0.861763	210327_s_at	AGXT	0.862823	219768_at	VTCN1	0.804987	201130_s_at	CDH1	0.700726
202246_s_at	CDK4	0.919129	222387_s_at	VPS35	0.860675	201432_at	CAT	0.862385	202826_at	SPINT1	0.804108	205371_s_at	DBT	0.694083
203764_at	DLG7	0.918592	1554794_a_at	UBE3C	0.860395	207244_x_at	CYP2A6	0.861971	212713_at	MFAP4	0.79375	214252_s_at	CLN5	0.693936
204822_at	TTK	0.918472	208853_s_at	CANX	0.858013	207202_s_at	NR1I2	0.859572	203074_at	ANXA8 /// LOC653107 /// ANXA8L1	0.788699	202502_at	ACADM	0.693904
207828_s_at	CENPF	0.918016	1552660_a_at	C5ORF22	0.856785	1564706_s_at	GLS2	0.857871	206049_at	SELP	0.782655	207804_s_at	FCN2	0.693735
209642_at	BUB1	0.91702	222386_s_at	COPZ1	0.855609	209531_at	GSTZ1	0.857741	201839_s_at	TACSTD1	0.778719	220037_s_at	XLKD1	0.691719
212022_s_at	MKI67	0.916411	200641_s_at	YWHAZ	0.852674	202025_x_at	ACAA1	0.856082	209892_at	FUT4	0.775412	205984_at	CRHBP	0.688458
1552619_a_at	ANLN	0.916295	217356_s_at	PGK1	0.852619	210452_x_at	CYP4F2	0.855514	207977_s_at	DPT	0.770138	205819_at	MARCO	0.686963
204825_at	MELK	0.915673	208750_s_at	ARF1	0.852615	206305_s_at	C8A	0.855109	207542_s_at	AQP1	0.768911	204344_s_at	SEC23A	0.685851
219588_s_at	NCAPG2	0.914987	202899_s_at	SFRS3	0.850994	221590_s_at	ALDH6A1	0.853804	204451_at	FZD1	0.768258	203711_s_at	HIBCH	0.685586
209714_s_at	CDKN3	0.914869	209080_x_at	TXNL2	0.850572	206754_s_at	CYP2B7P1	0.853299	212573_at	ENDOD1	0.766369	210481_s_at	CLEC4M	0.684911
203554_x_at	PTTG1	0.913271	210759_s_at	PSMA1	0.848562	206449_s_at	MASP1	0.852905	201976_s_at	MYO10	0.763232	220114_s_at	STAB2	0.684222
219148_at	PBK	0.913166	207974_s_at	SKP1A	0.846822	219733_s_at	SLC27A5	0.852013	213122_at	TSPYL5	0.754913	201647_s_at	SCARB2	0.680204
209408_at	KIF2C	0.909916	1555334_s_at	SLC30A5	0.84648	219954_s_at	GBA3	0.851094	206336_at	CXCL6	0.753391	201847_at	LIPA	0.674509
203564_at	FANCG	0.908367	200751_s_at	HNRPC	0.844574	221605_s_at	PIPOX	0.850718	222450_at	TMEPAI	0.752365	217743_s_at	TMEM30A	0.671069
213226_at	CCNA2	0.907668	204427_s_at	TMED2	0.844183	206755_at	CYP2B6	0.850253	213519_s_at	LAMA2	0.750045	200883_at	UQCRC2	0.670295
208795_s_at	MCM7	0.904565	206075_s_at	CSNK2A1	0.843765	210013_at	HPX	0.849483	222240_s_at	ISYNA1	0.749956	217883_at	C2ORF25	0.66678
219990_at	E2F8	0.902766	201742_x_at	SFRS1	0.839757	210521_s_at	FETUB	0.849091	210084_x_at	TPSAB1	0.749273	1553296_at	GPR128	0.665973
204767_s_at	FEN1	0.898779	208310_s_at	C7ORF28A /// C7ORF28B	0.837292	206753_at	RDH16	0.847378	203851_at	IGFBP6	0.748341	209384_at	PROSC	0.662829
219306_at	KIF15	0.898747	201476_s_at	RRM1	0.837106	221188_s_at	CIDEB	0.846568	204931_at	TCF21	0.746345	218432_at	FBXO3	0.662005
200783_s_at	STMN1	0.898502	1552264_a_at	MAPK1	0.835178	204997_at	GPD1	0.844016	209016_s_at	KRT7	0.74207	221679_s_at	ABHD6	0.660692
211623_s_at	FBL	0.898465	201457_x_at	BUB3	0.834015	207621_s_at	PEMT	0.843592	1558680_s_at	PDE1A	0.732966	213655_at	PAFAH1B1	0.660396
204835_at	POLA1	0.897459	201376_s_at	HNRPF	0.833393	208147_s_at	CYP2C8	0.84346	206580_s_at	EFEMP2	0.732379	1554830_a_at	STEAP3	0.659382
218542_at	CEP55	0.896757	1558015_s_at	ACTR2	0.833112	201135_at	ECHS1	0.840684	214454_at	ADAMTS2	0.732233	203293_s_at	LMAN1	0.659124
218726_at	DKFZP762E1312	0.896585	210802_s_at	DIMT1L	0.831362	222083_at	GLYAT	0.840379	218729_at	LXN	0.731302	209278_s_at	TFPI2	0.658125
204023_at	RFC4	0.895637	212595_s_at	DAZAP2	0.830682	205498_at	GHR	0.840061	200824_at	GSTP1	0.730977	203735_x_at	PPFIBP1	0.656925
204962_s_at	CENPA	0.895285	210935_s_at	WDR1	0.829925	214142_at	ZG16	0.836473	204457_s_at	GAS1	0.726191	205480_s_at	UGP2	0.655689
1553984_s_at	DTYMK /// LOC643109 /// LOC653208	0.895076	211016_x_at	HSPA4	0.829742	202003_s_at	ACAA2	0.836307	205044_at	GABRP	0.725796	209368_at	EPHX2	0.654166
201555_at	MCM3	0.894857	214959_s_at	API5	0.829628	202847_at	PCK2	0.83538	210119_at	KCNJ15	0.724268	201968_s_at	PGM1	0.65355
221685_s_at	CCDC99	0.894064	214845_s_at	CALU	0.827757	204428_s_at	LCAT	0.834808	203029_s_at	PTPRN2	0.719359	210909_x_at	LPAL2	0.652661
218039_at	NUSAP1	0.890473	202199_s_at	SRPK1	0.82629	221662_s_at	SLC22A7	0.834704	207826_s_at	ID3	0.718926	215253_s_at	DSCR1	0.649958
219787_s_at	ECT2	0.890331	201386_s_at	DHX15	0.826116	207201_s_at	SLC22A1	0.833684	201218_at	CTBP2 /// LOC645291 /// LOC645508 /// LOC650999	0.716354	211681_s_at	PDLIM5	0.647954
219493_at	SHCBP1	0.889981	221423_s_at	YIPF5	0.824977	211733_x_at	SCP2	0.832136	209529_at	PPAP2C	0.716264	218191_s_at	LMBRD1	0.647624
222077_s_at	RACGAP1	0.889746	200806_s_at	HSPD1	0.823345	220786_s_at	SLC38A4	0.828453	201650_at	KRT19	0.715205	202675_at	SDHB	0.646837
218585_s_at	DTL	0.887801	201629_s_at	ACP1	0.822301	209977_at	PLG	0.826664	206932_at	CH25H	0.708913	204119_s_at	ADK	0.646443
200957_s_at	SSRP1	0.887794	210087_s_at	MPZL1	0.821152	201968_s_at	PGM1	0.826661	201301_s_at	ANXA4	0.708062	205866_at	FCN3	0.64615
204146_at	RAD51AP1	0.884453	222522_x_at	MRPS10	0.820554	209460_at	ABAT	0.825785	205935_at	FOXF1	0.704929	205329_s_at	SNX4	0.646143
213911_s_at	H2AFZ	0.88388	214007_s_at	PTK9	0.820423	217319_x_at	CYP4A11 /// CYP4A22 /// LOC654164	0.825768	219332_at	MICAL-L2	0.704088	218558_s_at	MRPL39	0.645465
206364_at	KIF14	0.882994	201784_s_at	C11ORF58	0.820033	220801_s_at	HAO2	0.825561	210755_at	HGF	0.698499	209057_x_at	CDC5L	0.645462
209053_s_at	WHSC1	0.882985	202089_s_at	SLC39A6	0.819145	210888_s_at	ITIH1	0.824926	209291_at	ID4	0.697164	209713_s_at	SLC35D1	0.642995
208752_x_at	NAP1L1	0.882531	217960_s_at	TOMM22	0.818162	210063_at	SARDH	0.823281	206629_at	ADAMTSL2	0.695427	220108_at	GNA14	0.642799
201774_s_at	NCAPD2	0.881754	1555226_s_at	C1ORF43	0.817961	208370_s_at	DSCR1	0.823017	207434_s_at	FXYD2	0.690858	209978_s_at	LPA /// PLG	0.642632
210250_x_at	ADSL	0.880411	220477_s_at	C20ORF30	0.816311	205392_s_at	CCL14 /// CCL15	0.822381	209436_at	SPON1	0.689116	219929_s_at	ZFYVE21	0.641509
202107_s_at	MCM2	0.878281	213548_s_at	CDV3	0.814795	205657_at	HAAO	0.821491	201163_s_at	IGFBP7	0.683249	202930_s_at	SUCLA2	0.641454
200095_x_at	RPS10	0.877937	1555326_a_at	ADAM9	0.813524	205530_at	ETFDH	0.820555	209442_x_at	ANK3	0.68324	206797_at	NAT2	0.640778
217946_s_at	SAE1	0.877063	203622_s_at	LOC56902	0.813223	213695_at	PON3	0.820538	220177_s_at	TMPRSS3	0.681339	202444_s_at	SPFH1	0.639372
204162_at	KNTC2	0.874635	210317_s_at	YWHAE	0.811685	201425_at	ALDH2	0.820112	206767_at	RBMS3	0.676312	205876_at	LIFR	0.638014
204026_s_at	ZWINT	0.87271	211450_s_at	MSH6	0.811088	219277_s_at	OGDHL	0.819321	214945_at	LOC202134	0.67393	207626_s_at	SLC7A2	0.63719
222039_at	LOC146909	0.871053	206920_s_at	GLE1L	0.810393	210909_x_at	LPAL2	0.817763	204223_at	PRELP	0.673208	212230_at	PPAP2B	0.63711
212832_s_at	CKAP5	0.870134	211212_s_at	ORC5L	0.809653	207218_at	F9	0.817365	213423_x_at	TUSC3	0.673039	201617_x_at	CALD1	0.635912
213599_at	OIP5	0.868605	202143_s_at	COPS8	0.809376	219076_s_at	PXMP2	0.817285	213661_at	DKFZP586H2123	0.671994	203972_s_at	PEX3	0.631031
209891_at	SPBC25	0.867604	200987_x_at	PSME3	0.809332	214180_at	MAN1C1	0.81723	220416_at	ATP8B4	0.667773	200803_s_at	TEGT	0.629386
210052_s_at	TPX2	0.867257	209456_s_at	FBXW11	0.808597	206840_at	AFM	0.817022	204271_s_at	EDNRB	0.666491	219058_x_at	TINAGL1	0.628777
208646_at	RPS14 /// LOC644068	0.867243	212105_s_at	DHX9	0.808426	212816_s_at	CBS	0.816864	215671_at	PDE4B	0.665651	222156_x_at	CCPG1	0.62806
201930_at	MCM6	0.866681	201351_s_at	YME1L1	0.807961	206878_at	DAO	0.816649	204606_at	CCL21	0.6649	207980_s_at	CITED2	0.627682
219918_s_at	ASPM	0.865105	210338_s_at	HSPA8	0.807476	203500_at	GCDH	0.816265	203088_at	FBLN5	0.664689	218582_at	42799	0.627517
203968_s_at	CDC6	0.862975	201529_s_at	RPA1	0.806569	214413_at	TAT	0.816099	218677_at	S100A14	0.664656	1552440_at	ADMR	0.62517
221258_s_at	KIF18A	0.8628	208698_s_at	NONO	0.806185	1553977_a_at	CYP39A1	0.815922	213438_at	NFASC	0.663971	209865_at	SLC35A3	0.624924
203022_at	RNASEH2A	0.861138	201267_s_at	PSMC3	0.806043				222453_at	CYBRD1	0.663507	221881_s_at	CLIC4	0.624916
205046_at	CENPE	0.859742	1554397_s_at	UEVLD	0.805776							204007_at	FCGR3B	0.622887
201892_s_at	IMPDH2	0.858151	201043_s_at	ANP32A	0.804358							207224_s_at	SIGLEC7	0.621976
200826_at	SNRPD2	0.857237	210449_x_at	MAPK14	0.803551							206210_s_at	CETP	0.621428
204244_s_at	DBF4	0.857071	202162_s_at	CNOT8	0.802961							1557226_a_at	LOC374569	0.620863
201518_at	CBX1	0.85602	201583_s_at	SEC23B	0.802889							205073_at	CYP2J2	0.619976
200040_at	KHDRBS1	0.855835	1555618_s_at	SAE1	0.802134							215649_s_at	MVK	0.619936
209773_s_at	RRM2	0.855728	217909_s_at	MLX	0.802052
218233_s_at	C6ORF49	0.855403	200072_s_at	HNRPM	0.800354
204033_at	TRIP13	0.855291	1554417_s_at	APH1A	0.800187
			217919_s_at	MRPL42	0.798523
			222393_s_at	NAT12	0.798112
			201521_s_at	NCBP2	0.798006
			217301_x_at	RBBP4	0.797277
			208811_s_at	DNAJB6	0.797168

## Sheet: the number of patients for each
the number of patients for each stage
normal	cirrhotic from patients without HCC	cirrhotic	very early HCC	early HCC	low-grade dysplastic	high-grade dysplastic	advanced HCC	very advanced HCC
10	3	10	8	10	10	7	7	10
